# Supplementary figures and images for: Developmental compartments in the larval trachea of Drosophila
Source: eLife journal article supplement (doi:10.7554/elife.08666), 2015-10-22

Figure 4, Supplement 1

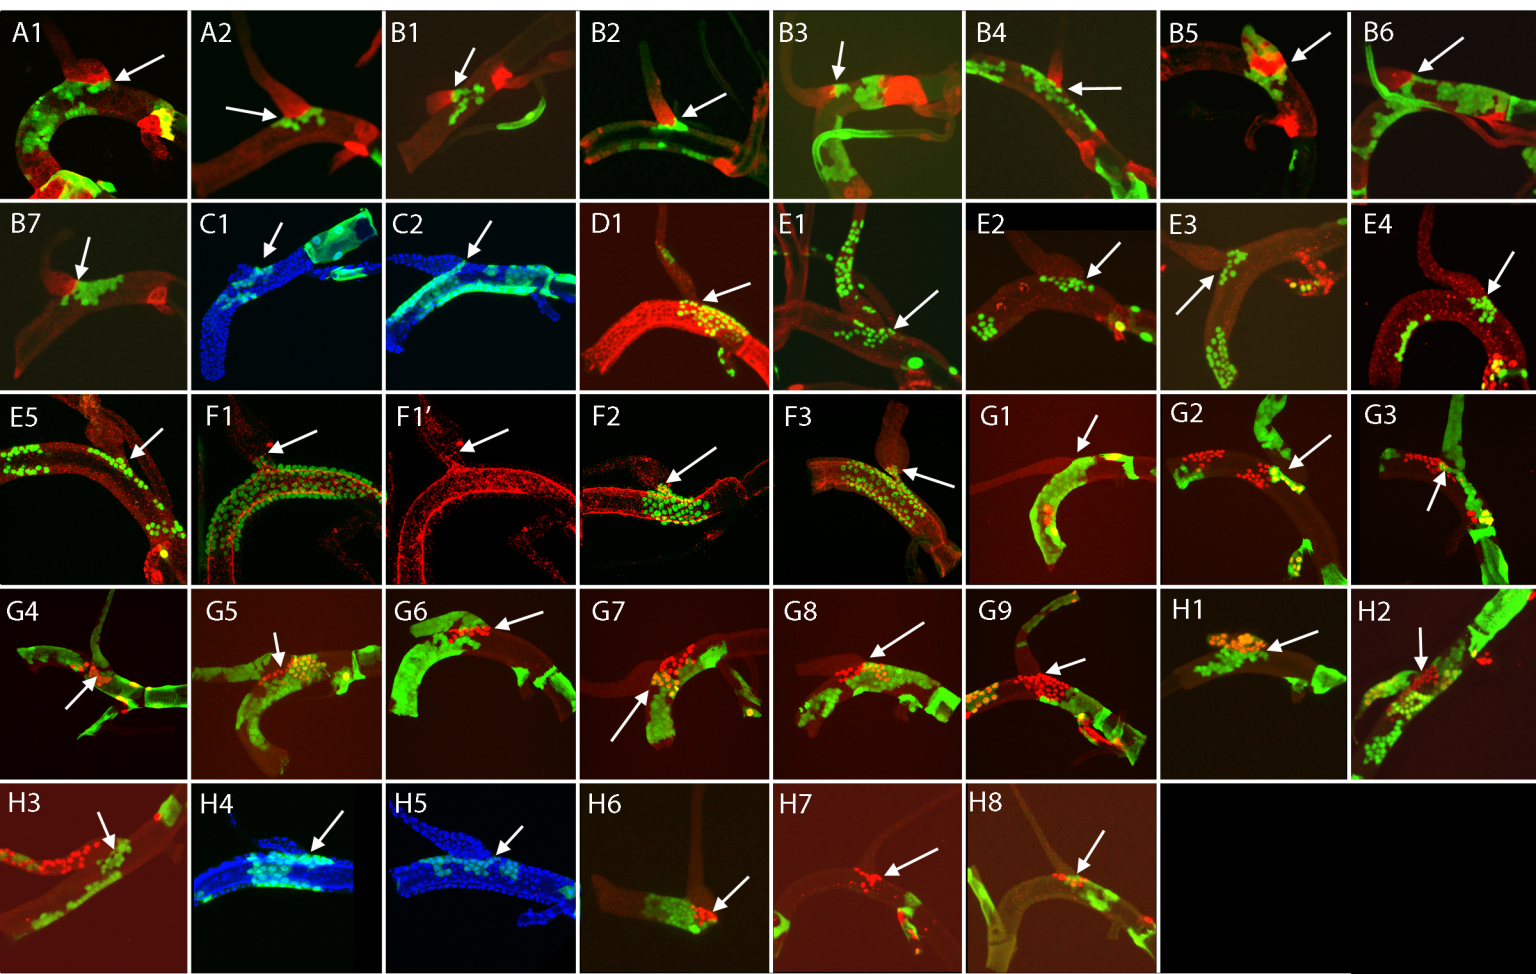

Supplement: supp [file elife_poa_e08666_Figure_4_figure_supplement_1.pdf › elife_poa_e08666_Figure_4_figure_supplement_1.pdf]

Figure 4, Supplement 2

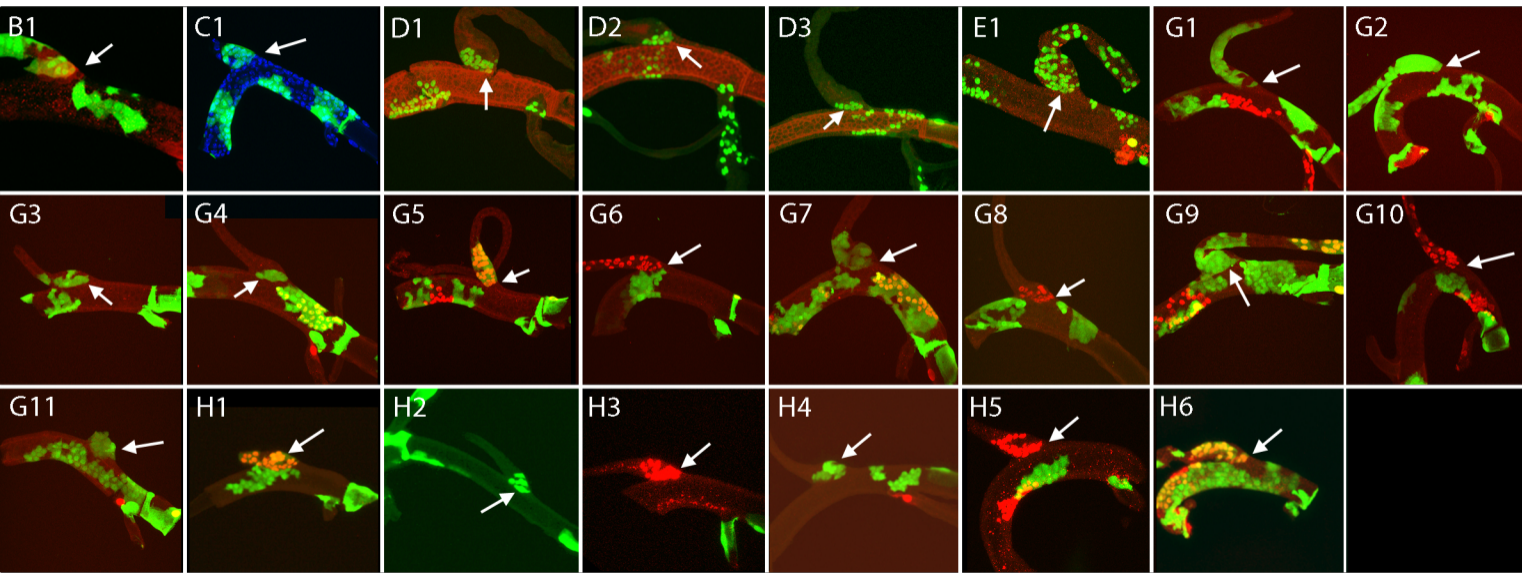

Supplement: supp [file elife_poa_e08666_Figure_4_figure_supplement_2.pdf › elife_poa_e08666_Figure_4_figure_supplement_2.pdf]

Figure 4, Supplement 3

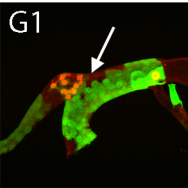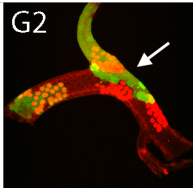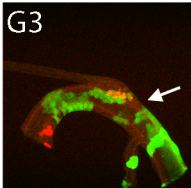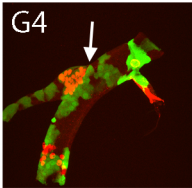

Supplement: supp [file elife_poa_e08666_Figure_4_figure_supplement_3.pdf › elife_poa_e08666_Figure_4_figure_supplement_3.pdf]

Figure 4, Supplement 4

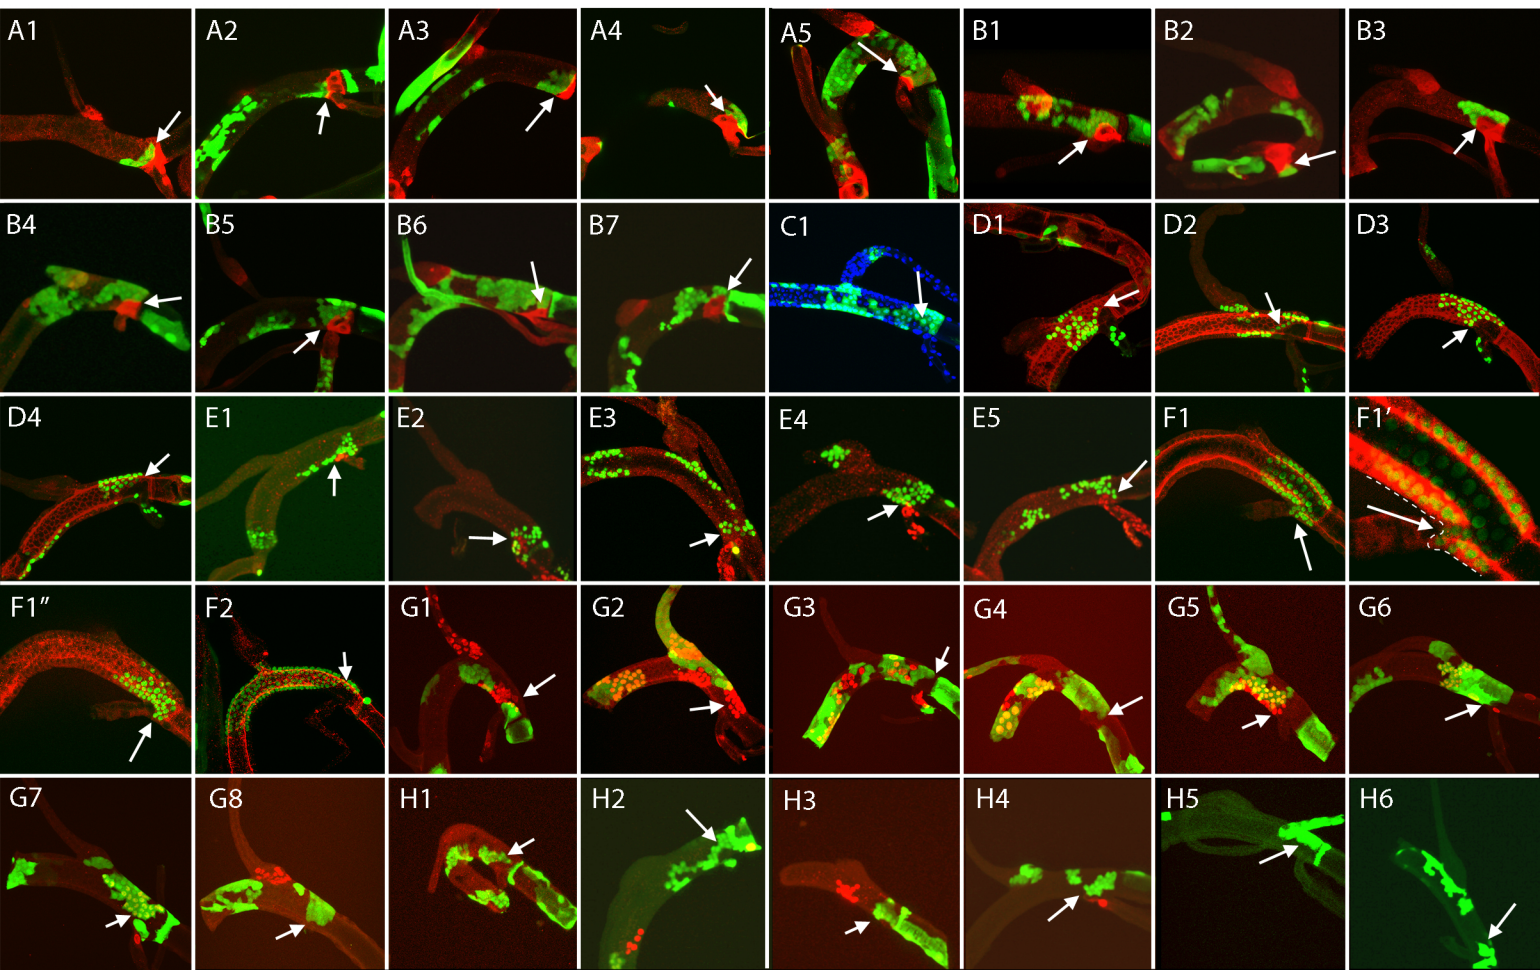

Supplement: supp [file elife_poa_e08666_Figure_4_figure_supplement_4.pdf › elife_poa_e08666_Figure_4_figure_supplement_4.pdf]

Figure 4, Supplement 5

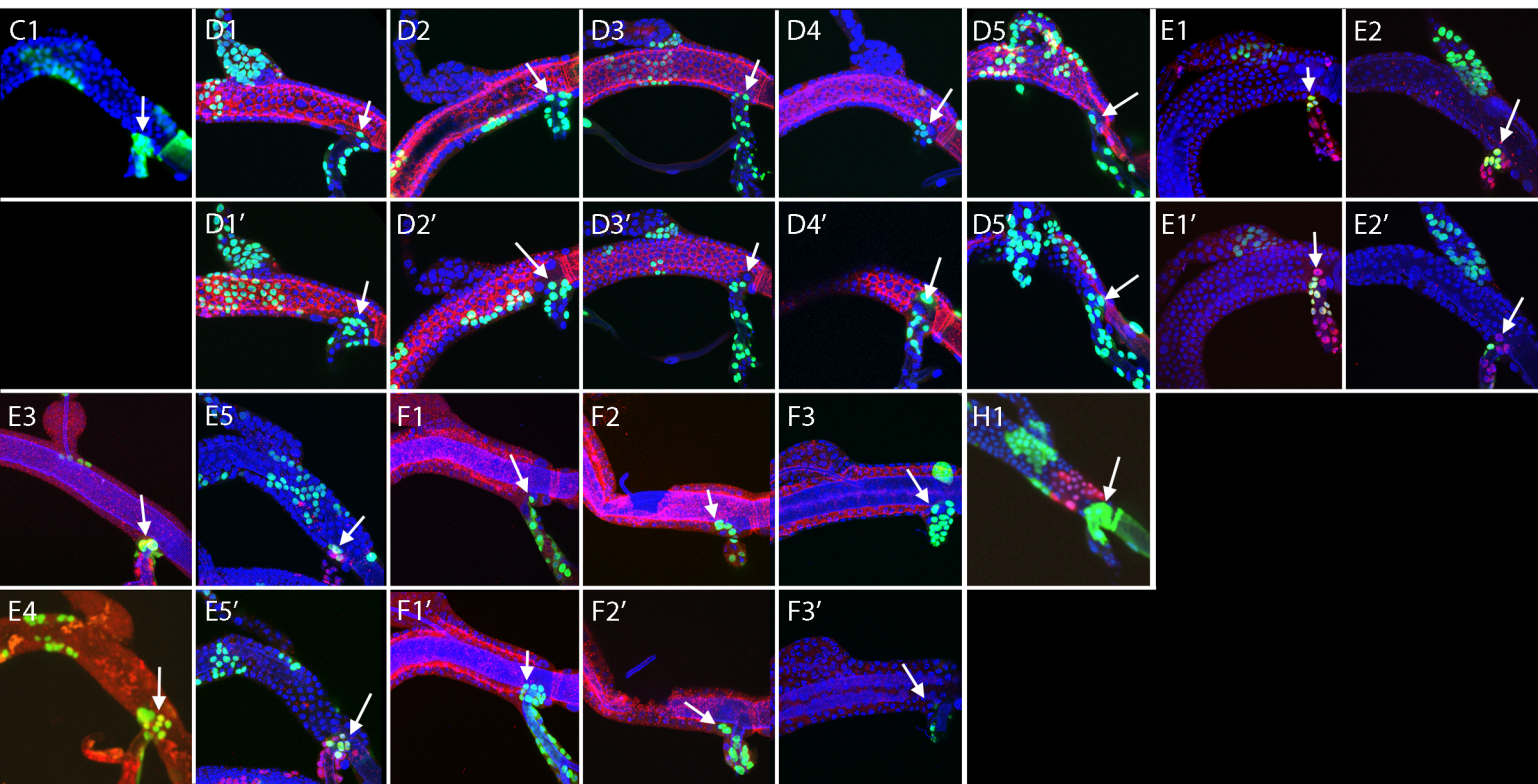

Supplement: supp [file elife_poa_e08666_Figure_4_figure_supplement_5.pdf › elife_poa_e08666_Figure_4_figure_supplement_5.pdf]

Figure 4, Supplement 6

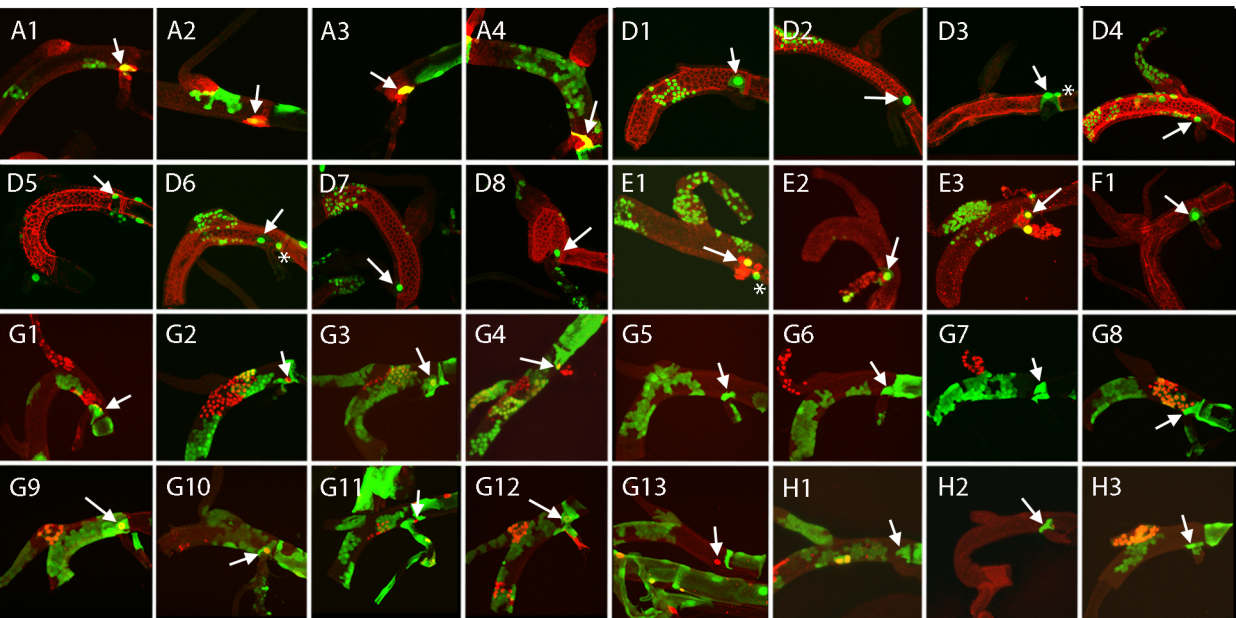

Supplement: supp [file elife_poa_e08666_Figure_4_figure_supplement_6.pdf › elife_poa_e08666_Figure_4_figure_supplement_6.pdf]

Figure 4, Supplement 7

Dorsal trunk / Dorsal branch

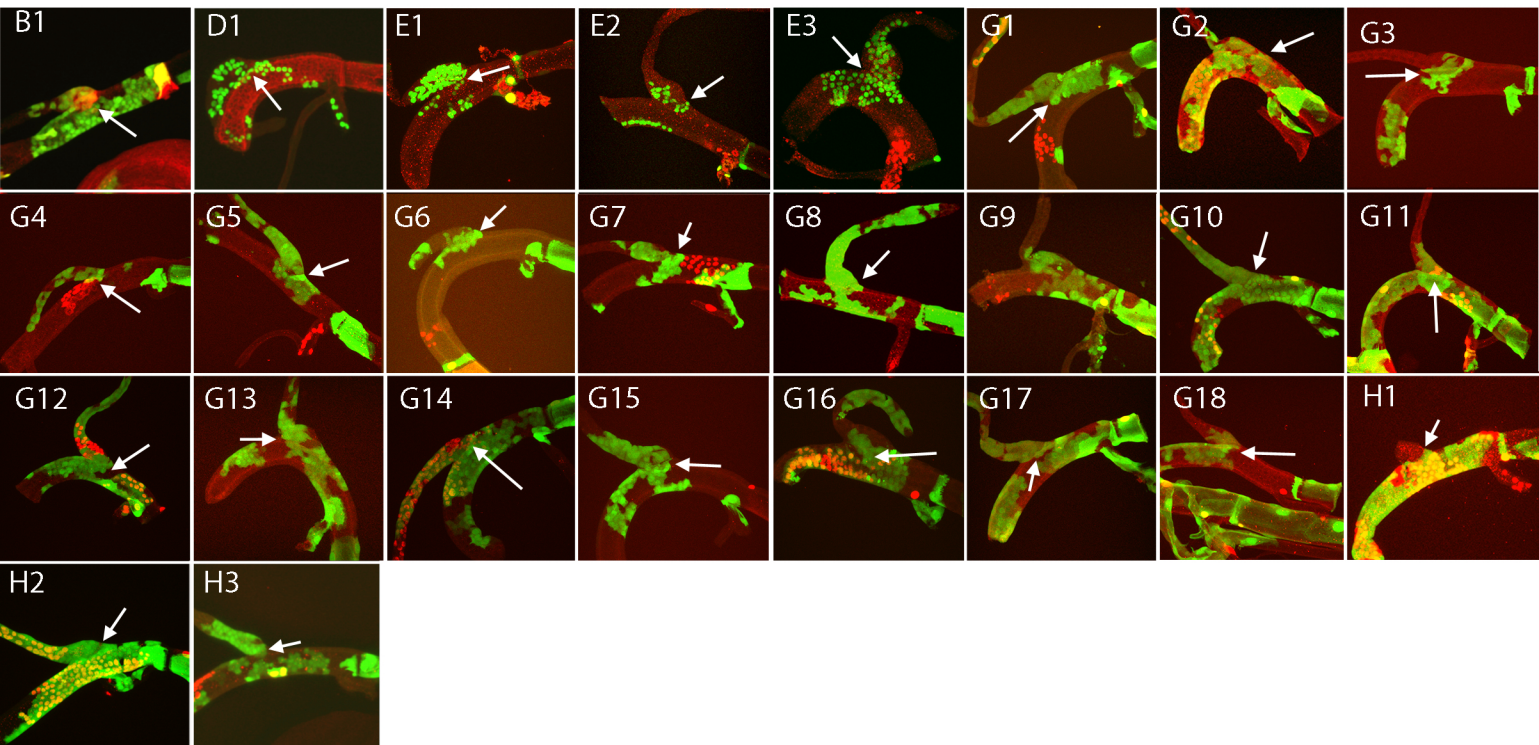

Dorsal trunk / Transverse connective

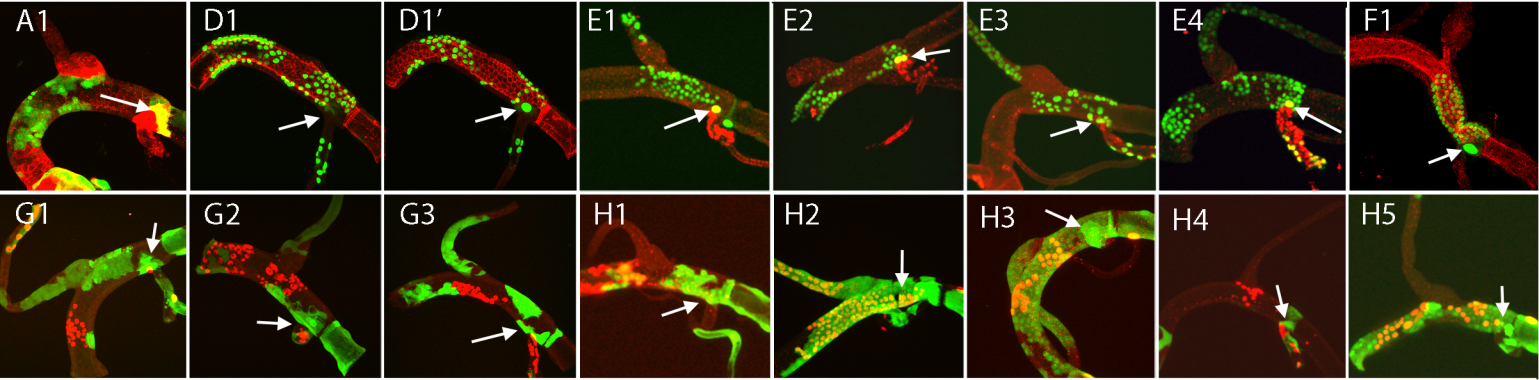

Supplement: supp [file elife_poa_e08666_Figure_4_figure_supplement_7.pdf › elife_poa_e08666_Figure_4_figure_supplement_7.pdf]
